# Supplementary material for: Rel Family Transcription Factor NFAT5 Upregulates COX2 via HIF-1α Activity in Ishikawa and HEC1a Cells
Source: Int J Mol Sci. 2024 Mar 25;25(7):3666. doi: 10.3390/ijms25073666 (PMC11012216; doi:10.3390/ijms25073666)
Supplement: Supplementary file 1 [file ijms-25-03666-s001.zip › Supplementary Table 1.xlsx]

## Sheet: Sheet1
Table S1: Gene list upon NFAT5 transfection in Ishikawa cells
logFC	logCPM	LR	PValue	FDR	logFC.rounded	FC	FC.rounded	symbol	status
5.21514	-0.722549	160.791	7.6001e-37	1.1901e-32	5.2	36.7583	36.8	TCHH	Up
2.70569	9.17576	64.544	9.44012e-16	4.92743e-12	2.7	6.49802	6.5	NFAT5	Up
1.74993	0.235794	57.4798	3.41465e-14	1.33675e-10	1.7	3.24901	3.2	LGR6	Up
1.65198	0.535289	34.9509	3.38133e-09	3.78202e-06	1.7	3.24901	3.2	CRYAB	Up
1.14416	1.74835	47.1938	6.43039e-12	1.67823e-08	1.1	2.14355	2.1	RP11-632C17__A.1	Up
1.0767	3.81968	27.9005	1.27714e-07	7.40695e-05	1.1	2.14355	2.1	SLC14A2	Up
1.02818	1.78279	12.5825	0.000389379	0.0203923	1	2	2	PRSS35	Up
-0.85526	0.443347	19.1496	1.20863e-05	0.00197145	-0.9	0.535887	0.5	ANKRD1	Down
-0.842337	0.360313	25.7485	3.88923e-07	0.00018455	-0.8	0.574349	0.6	CTB-119C2.1	Down
0.786765	0.534734	16.4294	5.04969e-05	0.00549006	0.8	1.7411	1.7	ELF5	Up
-0.783569	-0.363049	13.1476	0.000287893	0.0170118	-0.8	0.574349	0.6	TXK	Down
-0.664327	0.945795	22.4285	2.1811e-06	0.000636672	-0.7	0.615572	0.6	AVIL	Down
-0.61237	-0.0547449	11.0576	0.000883236	0.0339818	-0.6	0.659754	0.7	HIST1H1E	Down
-0.606864	1.10941	14.8674	0.000115337	0.00926185	-0.6	0.659754	0.7	NBPF16	Down
0.60523	4.1957	22.8257	1.77382e-06	0.000538465	0.6	1.51572	1.5	LOXL2	Up
0.600162	-0.0606503	10.6713	0.0010881	0.0381175	0.6	1.51572	1.5	SLC7A7	Up
0.590729	6.87311	32.7318	1.05793e-08	8.28308e-06	0.6	1.51572	1.5	AKR1B1	Up
0.573687	0.580389	12.8411	0.000339083	0.0189192	0.6	1.51572	1.5	GBP2	Up
0.571934	3.32517	36.4987	1.52767e-09	1.84013e-06	0.6	1.51572	1.5	SLCO4A1	Up
0.566976	1.11509	13.4365	0.000246782	0.0154574	0.6	1.51572	1.5	ANG	Up
0.560167	0.397902	11.5091	0.000692559	0.0291526	0.6	1.51572	1.5	GTF2IRD2B	Up
0.558838	1.30685	21.6867	3.21006e-06	0.000851973	0.6	1.51572	1.5	ANK1	Up
-0.543296	0.210915	10.5744	0.00114667	0.0391804	-0.5	0.707107	0.7	ENOX1	Down
-0.536572	1.28353	12.1486	0.000491256	0.0235824	-0.5	0.707107	0.7	CREB5	Down
-0.52913	2.58813	38.2148	6.33691e-10	9.02088e-07	-0.5	0.707107	0.7	HERC2P3	Down
0.509634	4.26785	20.9513	4.71113e-06	0.00113495	0.5	1.41421	1.4	SLC6A12	Up
0.500057	5.62995	23.4018	1.31458e-06	0.000467841	0.5	1.41421	1.4	CLIP2	Up
0.493616	0.799291	10.5868	0.00113897	0.0390266	0.5	1.41421	1.4	CTD-2319I12.1	Up
0.476737	4.3988	18.9572	1.33681e-05	0.00209331	0.5	1.41421	1.4	NTN4	Up
0.472072	3.50827	26.1087	3.22725e-07	0.000163018	0.5	1.41421	1.4	LAMP3	Up
0.459033	0.880391	10.7	0.00107133	0.0379088	0.5	1.41421	1.4	IRAK2	Up
-0.453928	1.10192	10.2927	0.00133554	0.0432093	-0.5	0.707107	0.7	KRT17	Down
0.437789	1.22197	10.5295	0.00117487	0.0396492	0.4	1.31951	1.3	TMEM178A	Up
0.43694	1.82136	11.9224	0.000554627	0.0252468	0.4	1.31951	1.3	SVEP1	Up
-0.430753	2.69217	14.4101	0.000147014	0.0109623	-0.4	0.757858	0.8	VCX3A	Down
0.415679	3.87896	39.4692	3.33275e-10	5.79862e-07	0.4	1.31951	1.3	PPAP2A	Up
0.404387	1.54736	11.9765	0.000538766	0.0248133	0.4	1.31951	1.3	ABCA1	Up
0.400299	3.83662	12.6544	0.000374686	0.0200932	0.4	1.31951	1.3	FBXO2	Up
0.39636	1.59847	11.7251	0.000616624	0.0269713	0.4	1.31951	1.3	AC062029.1	Up
-0.393569	3.48988	21.345	3.83617e-06	0.000984763	-0.4	0.757858	0.8	BCYRN1	Down
0.388252	6.90647	73.0859	1.24131e-17	9.71881e-14	0.4	1.31951	1.3	ATP1B1	Up
-0.379068	1.79597	13.5117	0.000237086	0.0150916	-0.4	0.757858	0.8	REC8	Down
0.378181	2.21478	9.90747	0.00164609	0.049761	0.4	1.31951	1.3	FAM49A	Up
-0.377156	1.5641	11.7279	0.000615699	0.0269713	-0.4	0.757858	0.8	LSMEM1	Down
-0.36739	2.63493	14.1718	0.000166854	0.0119682	-0.4	0.757858	0.8	DLX2	Down
-0.358726	1.87283	12.7899	0.000348497	0.0191406	-0.4	0.757858	0.8	GUCA1B	Down
-0.358044	1.87898	10.7458	0.00104515	0.0375366	-0.4	0.757858	0.8	AOC3	Down
0.353811	4.30834	36.8916	1.24883e-09	1.62962e-06	0.4	1.31951	1.3	NUPR1	Up
-0.344216	3.61988	10.6132	0.00112282	0.0388129	-0.3	0.812252	0.8	RP11-632K20.7	Down
0.341072	3.54215	11.495	0.000697824	0.0292243	0.3	1.23114	1.2	CD24P4	Up
0.335882	2.4512	14.0336	0.000179574	0.0123378	0.3	1.23114	1.2	EDA2R	Up
-0.332382	2.50336	13.6478	0.000220496	0.0145589	-0.3	0.812252	0.8	TMEM86B	Down
0.328625	4.70433	33.7083	6.40257e-09	5.89752e-06	0.3	1.23114	1.2	EHF	Up
-0.321502	4.26099	44.3073	2.80671e-11	5.49378e-08	-0.3	0.812252	0.8	HR	Down
0.321032	4.0646	16.9448	3.84827e-05	0.00460001	0.3	1.23114	1.2	LRRC17	Up
0.32068	2.77725	18.1222	2.07166e-05	0.00294911	0.3	1.23114	1.2	PTGS2	Up
0.313434	3.70862	9.9313	0.00162491	0.0495029	0.3	1.23114	1.2	DOCK8	Up
